# Supplementary material for: The histone H3K4 demethylase JARID1A directly interacts with haematopoietic transcription factor GATA1 in erythroid cells through its second PHD domain
Source: PubMed Central journal article supplement (PMC7029945; doi:10.1098/rsos.191048), 2020-01-29
Supplement: rsos191048supp1.pdf [file rsos191048supp1.pdf]

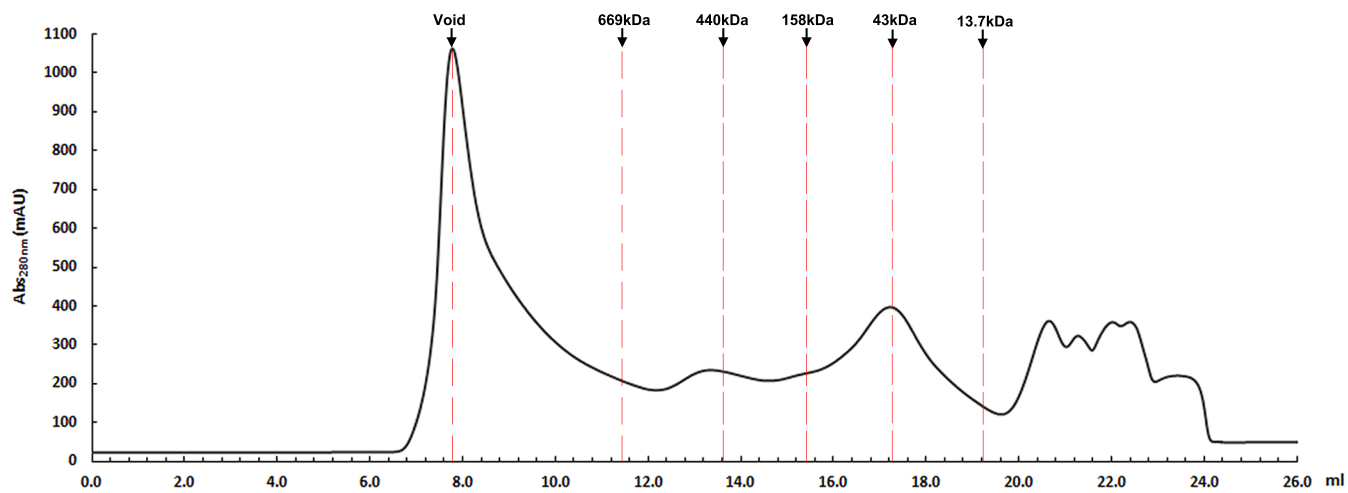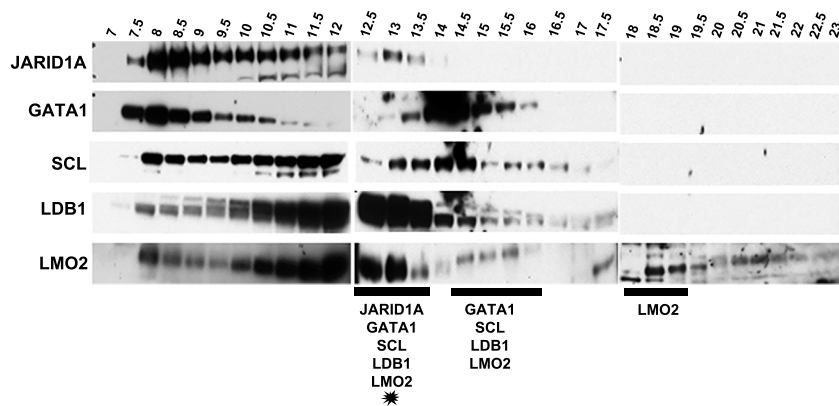

**Supplementary Fig. 1**
