# Supplementary material for: The histone H3K4 demethylase JARID1A directly interacts with haematopoietic transcription factor GATA1 in erythroid cells through its second PHD domain
Source: PubMed Central journal article supplement (PMC7029945; doi:10.1098/rsos.191048), 2020-01-29
Supplement: rsos191048supp2.pdf [file rsos191048supp2.pdf]

# 500 MHz $^1\text{H}$ - $^{15}\text{N}$ HSQC spectrum of JARID1A PH2

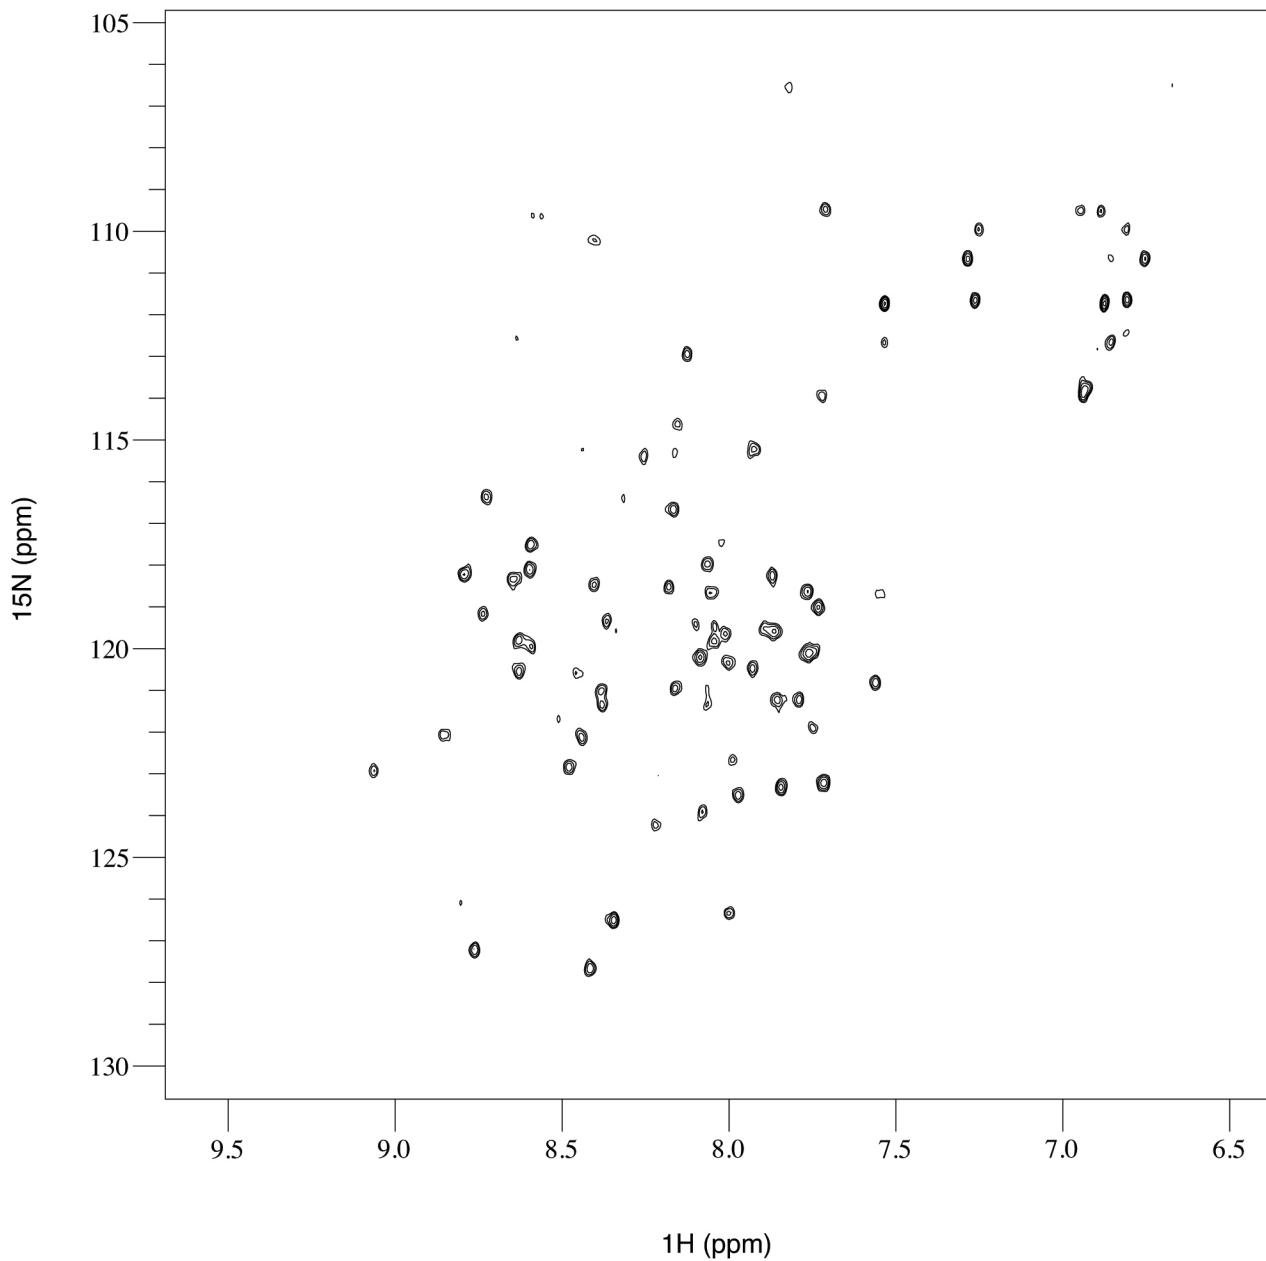

**Supplementary Fig. 2**
